## Association between IL4, IL6 gene polymorphism and lumbar disc degeneration in Chinese population

Yong Zhu<sup>1,\*</sup>, Shunan Li<sup>2,\*</sup>, FangLin Niu<sup>3</sup>, Mengdan Yan<sup>3</sup>, Jing Li<sup>3</sup>, Haiyu Jia<sup>4</sup> and Xuejun Yang<sup>1</sup>

<sup>1</sup>The Second Affiliated Hospital of Inner Mongolia Medical University, Hohhot 010030, China

<sup>2</sup>The Hohhot First Hospital, Hohhot 010020, China

<sup>3</sup>Key Laboratory of Resource Biology and Biotechnology in Western China (Northwest University), Ministry of Education, Xi'an 710069, China

<sup>4</sup>The Affiliated Hospital of Inner Mongolia Medical University, Hohhot 010020, China

\*These authors have contributed equally to this work

**Correspondence to:** Xuejun Yang, **email:** yangxjhohhot@163.com  
Haiyu Jia, **email:** nmjiahaiyu@qq.com

**Keywords:** lumbar disc disease (LDD), IL4, IL6, Han Chinese, case-control

**Received:** July 13, 2017

**Accepted:** August 27, 2017

**Published:** October 06, 2017

**Copyright:** Zhu et al. This is an open-access article distributed under the terms of the Creative Commons Attribution License 3.0 (CC BY 3.0), which permits unrestricted use, distribution, and reproduction in any medium, provided the original author and source are credited.

### ABSTRACT

**Lumbar disc disease (LDD) is a common musculoskeletal disorder, caused by degeneration of intervertebral discs of the lumbar spine and is one of the most common musculoskeletal disorders affliction in adult. There is growing evidence that LDD has strong genetic determinants. We analyze whether the IL4 and IL6 gene polymorphism is related to LDD in Chinese Han population. The participants were 498 with LDD and 463 without LDD. IL4 and IL6 gene polymorphism were determined by Sequenom MassARRAY. We found that SNPs rs1800796(OR = 1.29, 95% CI, 1.07 – 1.57, p = 0.009), rs1524107(OR = 1.28, 95% CI, 1.05 – 1.55, p = 0.013), rs2069840 (OR = 1.39, 95% CI, 1.03 – 1.89, p = 0.033) in IL6 gene were significantly associated with LDD risk at a 5% level. In addition, genetic models found IL4 gene (rs2243250) were associated with LDD. In this study, we analyzed and associated SNPs of IL4 and IL6 with LDD risk. In summary, four variations (rs1800796, rs1524107, rs2069840, rs2243250) of the selected candidate SNPs were associated with susceptibility to LDD in our study. The results of this study have the guiding significance in clinical work in the future in the treatment of lumbar disc herniation patients, not one-sided that the symptoms of low back pain only from mechanical oppression.**

### INTRODUCTION

Lumbar disc disease (LDD) is a common musculoskeletal disorder, caused by degeneration of intervertebral discs of the lumbar spine and is one of the most common musculoskeletal disorders affliction in adults [1, 2]. Etiology of degenerative disc disease is complex, it has been suggested that some environmental factors, such as physical loading [3], obesity [4], smoking [5] et al. may play a role. Although various environmental

have been implicated in the pathogenesis of disc degeneration, there is growing evidence that LDD has strong genetic determinants [6].

A great many genes have now been shown to be related to lumbar disc herniation, including MMP [7, 8], VDR [9], FAS [10] and COL [11] et al. It is generally believed that neuroinflammation plays a crucial role in the development of chronic pain [12]. It has been more and more is convinced of that lumbar disc pain may be pathophysiologically induced by chemical inflammation,

inflammatory cytokines are not only closely related to other cytokines and chemical mediators but also play an important role in lumbar disc herniation, although the inflammatory factors that contribute to lumbar disc herniation and pain remain to be determined [13]. Anthi Kelempisioti et al. [14] reported the associations of IL6 genes for DD among young adults in Northern Finland and indicated that IL6 is involved in the etiology of DD among young adults. Pasi J Eskola et al. [15] paper was to examine the associations between IL6 polymorphisms and LDD, the results suggest possible roles for IL6 in early DD among girls. Burke et al. [16] showed that herniated disc cells secrete large amounts of IL6 and other inflammatory mediators and cytokines that cause lumbar pain. Kang et al. [17] demonstrated that IL-6 was expressed in both normal and herniated discs, but was significantly induced in the herniated discs. Kraychete et al. [18] showed that patients with chronic low back pain due to disc herniation had high levels of TNF- $\alpha$  and IL-6. Thus, this study assessed single-nucleotide polymorphisms (SNPs) in the IL-4 and IL-6 with LDD risk in a Chinese Han population. It is well investigated that cytokines play a role in LDD.

## RESULTS

Table 1 give the volunteers characteristics, four hundred and ninety-eight patients with LDD (200 females, 298 males, 50.27 $\pm$ 12.53) and four hundred and sixty-three gender-matched (P=0.978) and age (P=0.413) and healthy adults (198 females, 265 males, 50.65 $\pm$ 11.79), were enrolled in this case-control study. The allele frequencies and characteristics of IL4 and IL6 SNPs are shown in Table 2. The genotype frequencies fit in with the Hardy-Weinberg equilibrium. Using the  $\chi^2$  test, three SNPs rs1800796 (OR = 1.29, 95% CI, 1.07 – 1.57, p = 0.009), rs1524107 (OR = 1.28, 95% CI, 1.05 – 1.55, p = 0.013), rs2069840 (OR = 1.39, 95% CI, 1.03 – 1.89, p = 0.033) in IL6 gene were significantly associated with LDD risk at a 5% level.

Next, we assumed that the minor allele of each SNP was a risk factor and four genetic models (co-dominant, dominant, recessive and additive) were used to further identify the associations between the SNPs and the LDD risk in Table 3. Four susceptibility SNPs were associated with LDD risk. For rs2243250 in IL4, the genotype “CC” compared with “TT/CT” was associated with a decreased risk of LDD in the recessive model before and after adjustment (OR = 0.50, 95% CI, 0.28 – 0.89, p = 0.016). In IL6 gene, we found three SNPs were increased the LDD risk. For rs1800796, the individual carrying “C” allele compared with “G” allele increased the LDD risk (Log-additive, OR = 1.29, 95% CI, 1.07 – 1.57, p = 0.0097) by unconditional logistic

regression adjusted for age and gender. The “C” allele of rs1524107 and the “G” allele of rs2069840 showed significantly increased risk of LDD (OR= 1.26, 95%CI = 1.04 - 1.53, P= 0.016; OR= 1.39, 95%CI: 1.02-1.89, P= 0.034, respectively).

Furthermore, Linkage disequilibrium (LD) and haplotype analyses of the SNPs were further studied. The LD block in Figure 1. In Table 4 haplotype analyses of the SNPs, we found the “CA” haplotype of rs1800796, rs2069837 was associated with LDD risk before and after the adjustment (adjusted OR= 1.56, 95%CI: 1.17-2.08, P= 0.0026).

Finally, we analyzed the effect of these SNPs and LDD association by age and gender stratification in Table 5. We found only one SNP (rs2069840, IL6, P = 0.019) polymorphism were associated with LDD in age < 50 population, meanwhile for age > 50 two SNPs were found significant (rs1800796, P = 0.029; rs1524107, P = 0.020). For female we did not find any SNPs were associated with LDD, however for male population three SNPs were found (rs1800796, P= 0.018; rs1524107, P=0.040; rs2069840, P=0.045).

## DISCUSSION

Disc degeneration is a process that begins early in life and is a result of various genetic and environmental factors and normal aging [19]. Pathophysiologically, various inflammatory factors play a role in inducing lumbar disc degeneration and nervous radical pain [20]. Although, how environmental and genetic factors modify risk of lumbar disc herniation or gene expression remain uncertain. In this study, we analyzed and associated SNPs of IL4 and IL6 with LDD risk. In summary, four variations (rs1800796, rs1524107, rs2069840, rs2243250) of the selected candidate SNPs were associated with susceptibility to LDD in our study.

IL-6 is a 184 amino acid glycoprotein, an important proinflammatory cytokine produced by activated inflammatory cells, including lymphocytes and macrophages [21]. As an important inflammatory mediator, IL6 plays an important role in rheumatoid arthritis and osteoarthritis. It is considered to be an important mediator of joint destruction and inflammation. [20]. IL6 may function by inhibiting the enzyme that affects the matrix degrading enzyme of the intervertebral disc. Matrix degrading enzyme can change of intervertebral disc matrix proteoglycan, collagen and elastin of biological macromolecules such as structure, function, level and type, weaken the protective effect of fiber ring, the nucleus protruding from the fiber ring is weak [22, 23]. Burke et al. [16] showed that herniated intervertebral disc cells were able to secrete a number of proinflammatory mediators and cytokines, including

**Table 1: Characteristics of LDD patients and control participants**

|        | Case        | Control     | P     |
|--------|-------------|-------------|-------|
|        | 498         | 463         |       |
| Gender |             |             | 0.413 |
| Male   | 298         | 265         |       |
| Female | 200         | 198         |       |
| Age    | 50.27±12.53 | 50.65±11.79 | 0.978 |

p ≤ 0.05 indicates statistical significance.  
p was calculated by Pearson's  $\chi^2$  test.

**Table 2: Basic information on candidate SNPs and their association with LDD risk in this study**

| SNP       | Gene | Chr    | Allele | MAF(case) | MAF(control) | HWE   | OR   | 95%CI     | P      |
|-----------|------|--------|--------|-----------|--------------|-------|------|-----------|--------|
| rs2243250 | IL4  | 5q31.1 | C/T    | 0.211     | 0.245        | 0.131 | 0.82 | 0.67-1.02 | 0.073  |
| rs2227284 | IL4  | 5q31.1 | G/T    | 0.16      | 0.172        | 0.100 | 0.92 | 0.72-1.17 | 0.477  |
| rs2243267 | IL4  | 5q31.1 | G/C    | 0.212     | 0.240        | 0.253 | 0.85 | 0.69-1.06 | 0.144  |
| rs2243270 | IL4  | 5q31.1 | A/G    | 0.212     | 0.240        | 0.253 | 0.85 | 0.69-1.06 | 0.144  |
| rs2243283 | IL4  | 5q31.1 | G/C    | 0.161     | 0.185        | 0.120 | 0.84 | 0.66-1.07 | 0.156  |
| rs2243289 | IL4  | 5q31.1 | A/G    | 0.211     | 0.234        | 0.244 | 0.87 | 0.70-1.08 | 0.216  |
| rs1800796 | IL6  | 7p15.3 | G/C    | 0.344     | 0.288        | 0.309 | 1.29 | 1.07-1.57 | 0.009* |
| rs2069837 | IL6  | 7p15.3 | G/A    | 0.203     | 0.189        | 0.097 | 1.09 | 0.87-1.37 | 0.452  |
| rs1524107 | IL6  | 7p15.3 | T/C    | 0.35      | 0.297        | 0.025 | 1.28 | 1.05-1.55 | 0.013* |
| rs2069840 | IL6  | 7p15.3 | G/C    | 0.112     | 0.083        | 0.116 | 1.39 | 1.03-1.89 | 0.033* |

MAF: minor allele frequency; OR: odds ratio; 95% CI: 95% confidence interval. \* p < 0.05 indicates statistical significance. HWE p ≤ 0.01 is excluded.

IL-6, which are accompanied by pain in the lumbar region. There are many IL6 polymorphisms that have been associated with disc degeneration, specifically rs1800797, rs1800796, rs1800795 and rs13006435 [21, 24]. In this study, we found an association of IL-6 SNPs (rs1800796, rs1524107, rs2069840) with an increased risk of developing lumbar disc herniation. Genetic variants in the IL-6 promoter region may lead to aberrant cell transcription and expression. Thereby affecting individual susceptibility to various diseases

In this study, for the first time we focused on anti-inflammatory cytokine, IL-4 in patients with LDD to examine the hypothesis that say LDD could be caused by change in immune system. Studies have shown that the IL-4 polymorphism may affect the function of

monocytes, not only producing IL-4, but also producing other cytokines [25]. Remarkably, our results for the first time provided evidence that enhance our understanding of how migraine may relate to, an anti-inflammatory cytokine, IL-4 gene variation. These polymorphisms may lead to changing in IL-4 affinity to their cell targets and consequently unbalance. IL-4 appears to be a prospective target for future development of LDD preventive therapies.

The data presented here must be viewed with caution, because the number of patients is relatively small, so these results should be considered preliminary, this study did not have the ability to convert these SNPs and clinical data, such as pain level, although our data show that IL-4, IL-6 gene polymorphism may be the genetic

**Table 3: Association between IL4, IL6 genotypes and LDD risk under different genotypic models**

|           | Model        | Genotype   | Control     | Case                | OR <sup>a</sup><br>(95% CI) | P <sup>a</sup> -value | OR <sup>b</sup><br>(95% CI) | P <sup>b</sup> -value |
|-----------|--------------|------------|-------------|---------------------|-----------------------------|-----------------------|-----------------------------|-----------------------|
| rs2243250 | Codominant   | T/T        | 270 (58.3%) | 307 (61.6%)         | 1                           | 0.052                 | 1                           | 0.052                 |
|           |              | C/T        | 159 (34.3%) | 172 (34.5%)         | 0.95<br>(0.73-1.25)         |                       | 0.95<br>(0.72-1.24)         |                       |
|           |              | C/C        | 34 (7.3%)   | 19 (3.8%)           | 0.49<br>(0.27-0.88)         |                       | 0.49<br>(0.27-0.88)         |                       |
|           | Dominant     | T/T        | 270 (58.3%) | 307 (61.6%)         | 1                           | 0.29                  | 1                           | 0.28                  |
|           |              | C/T-C/C    | 193 (41.7%) | 191 (38.4%)         | 0.87<br>(0.67-1.13)         |                       | 0.87<br>(0.67-1.12)         |                       |
|           | Recessive    | T/T-C/T    | 429 (92.7%) | 479 (96.2%)         | 1                           | 0.016                 | 1                           | 0.016                 |
| C/C       |              | 34 (7.3%)  | 19 (3.8%)   | 0.50<br>(0.28-0.89) |                             | 0.50<br>(0.28-0.89)   |                             |                       |
|           | Log-additive | ---        | ---         | ---                 | 0.83 (0.67-1.02)            | 0.076                 | 0.82<br>(0.67-1.02)         | 0.073                 |
| rs1800796 | Codominant   | C/C        | 239 (51.6%) | 210 (42.2%)         | 1                           | 0.015                 | 1                           | 0.016                 |
|           |              | G/C        | 181 (39.1%) | 232 (46.7%)         | 1.46<br>(1.12-1.91)         |                       | 1.45<br>(1.11-1.90)         |                       |
|           |              | G/G        | 43 (9.3%)   | 55 (11.1%)          | 1.46<br>(0.94-2.26)         |                       | 1.45<br>(0.93-2.26)         |                       |
|           | Dominant     | C/C        | 239 (51.6%) | 210 (42.2%)         | 1                           | 0.0036                | 1                           | 0.004                 |
|           |              | G/C-G/G    | 224 (48.4%) | 287 (57.8%)         | 1.46<br>(1.13-1.88)         |                       | 1.45<br>(1.13-1.88)         |                       |
|           | Recessive    | C/C-G/C    | 420 (90.7%) | 442 (88.9%)         | 1                           | 0.36                  | 1                           | 0.37                  |
| G/G       |              | 43 (9.3%)  | 55 (11.1%)  | 1.22<br>(0.80-1.85) |                             | 1.21 (0.79-1.85)      |                             |                       |
|           | Log-additive | ---        | ---         | ---                 | 1.29<br>(1.07-1.57)         | 0.0088                | 1.29 (1.06-1.57)            | 0.0097                |
| rs1524107 | Codominant   | T/T        | 238 (51.6%) | 207 (41.6%)         | 1                           | 0.0055                | 1                           | 0.0063                |
|           |              | C/T        | 172 (37.3%) | 233 (46.8%)         | 1.56 (1.19-2.04)            |                       | 1.55<br>(1.18-2.03)         |                       |
|           |              | C/C        | 51 (11.1%)  | 58 (11.7%)          | 1.31<br>(0.86-1.99)         |                       | 1.30<br>(0.85-1.98)         |                       |
|           | Dominant     | T/T        | 238 (51.6%) | 207 (41.6%)         | 1                           | 0.0018                | 1                           | 0.0021                |
|           |              | C/T-C/C    | 223 (48.4%) | 291 (58.4%)         | 1.50<br>(1.16-1.94)         |                       | 1.49<br>(1.16-1.93)         |                       |
|           | Recessive    | T/T-C/T    | 410 (88.9%) | 440 (88.3%)         | 1                           | 0.78                  | 1                           | 0.78                  |
| C/C       |              | 51 (11.1%) | 58 (11.7%)  | 1.06<br>(0.71-1.58) |                             | 1.06<br>(0.71-1.58)   |                             |                       |
|           | Log-additive | ---        | ---         | ---                 | 1.27<br>(1.05-1.53)         | 0.014                 | 1.26<br>(1.04-1.53)         | 0.016                 |
| rs2069840 | Codominant   | C/C        | 391 (84.6%) | 386 (78.1%)         | 1                           | 0.0087                | 1                           | 0.0095                |
|           |              | G/C        | 65 (14.1%)  | 105 (21.3%)         | 1.64<br>(1.16-2.30)         |                       | 1.63<br>(1.16-2.29)         |                       |
|           |              | G/G        | 6 (1.3%)    | 3 (0.6%)            | 0.51<br>(0.13-2.04)         |                       | 0.51<br>(0.13-2.04)         |                       |
|           | Dominant     | C/C        | 391 (84.6%) | 386 (78.1%)         | 1                           | 0.0098                | 1                           | 0.011                 |
|           |              | G/C-G/G    | 71 (15.4%)  | 108 (21.9%)         | 1.54<br>(1.11-2.15)         |                       | 1.53<br>(1.10-2.14)         |                       |
|           | Recessive    | C/C-G/C    | 456 (98.7%) | 491 (99.4%)         | 1                           | 0.27                  | 1                           | 0.27                  |
| G/G       |              | 6 (1.3%)   | 3 (0.6%)    | 0.46<br>(0.12-1.87) |                             | 0.46<br>(0.12-1.87)   |                             |                       |
|           | Log-additive | ---        | ---         | ---                 | 1.39<br>(1.03-1.90)         | 0.032                 | 1.39<br>(1.02-1.89)         | 0.034                 |

OR: odds ratio; 95% CI: 95% confidence interval. \*  $p < 0.05$  indicates statistical significance.

<sup>a</sup>: calculated from two-sided chi-square tests or Fisher's exact tests for either genotype distribution.

<sup>b</sup>: calculated by unconditional logistic regression adjusted for age and sex.

**Table 4: IL6 haplotype frequencies and their associations with LDD risk**

|   | rs1800796 | rs2069837 | Freq   | OR <sup>a</sup> (95% CI) | P <sup>a</sup> -value | OR <sup>b</sup> (95% CI) | P <sup>b</sup> -value |
|---|-----------|-----------|--------|--------------------------|-----------------------|--------------------------|-----------------------|
| 1 | C         | A         | 0.6787 | 1                        | ---                   | 1                        | ---                   |
| 2 | G         | G         | 0.192  | 1.16 (0.93 - 1.46)       | 0.19                  | 1.16 (0.93 - 1.46)       | 0.190                 |
| 3 | G         | A         | 0.1252 | 1.57 (1.18 - 2.09)       | 0.0022                | 1.56 (1.17 - 2.08)       | 0.003                 |

OR: odds ratio; 95% CI: 95% confidence interval.

<sup>a</sup>: calculated from two-sided chi-square tests or Fisher's exact tests for either genotype distribution.

<sup>b</sup>: calculated by unconditional logistic regression adjusted for age and sex.

risk factors for developing LDD in this Han Chinese population.

The results of this study have the guiding significance in clinical work in the future in the treatment of lumbar disc herniation patients, not one-sided that the symptoms of low back pain only from mechanical oppression, inflammatory cytokine stimulation is also very important, can formulate treatment plan to take full account of this, whether the operation should

be integrated consider, after surgery treatment for thinking of drug use inhibition of inflammatory factor secretion, whether the long-term follow-up of patients can be detected in serum IL - 4, IL - 6 levels. Whether the author can be refined to the cell level in health examination, whether early screening protrusion of intervertebral disc, in order to achieve the purpose of prevention and treatment of secondary, these are worthy of consideration.

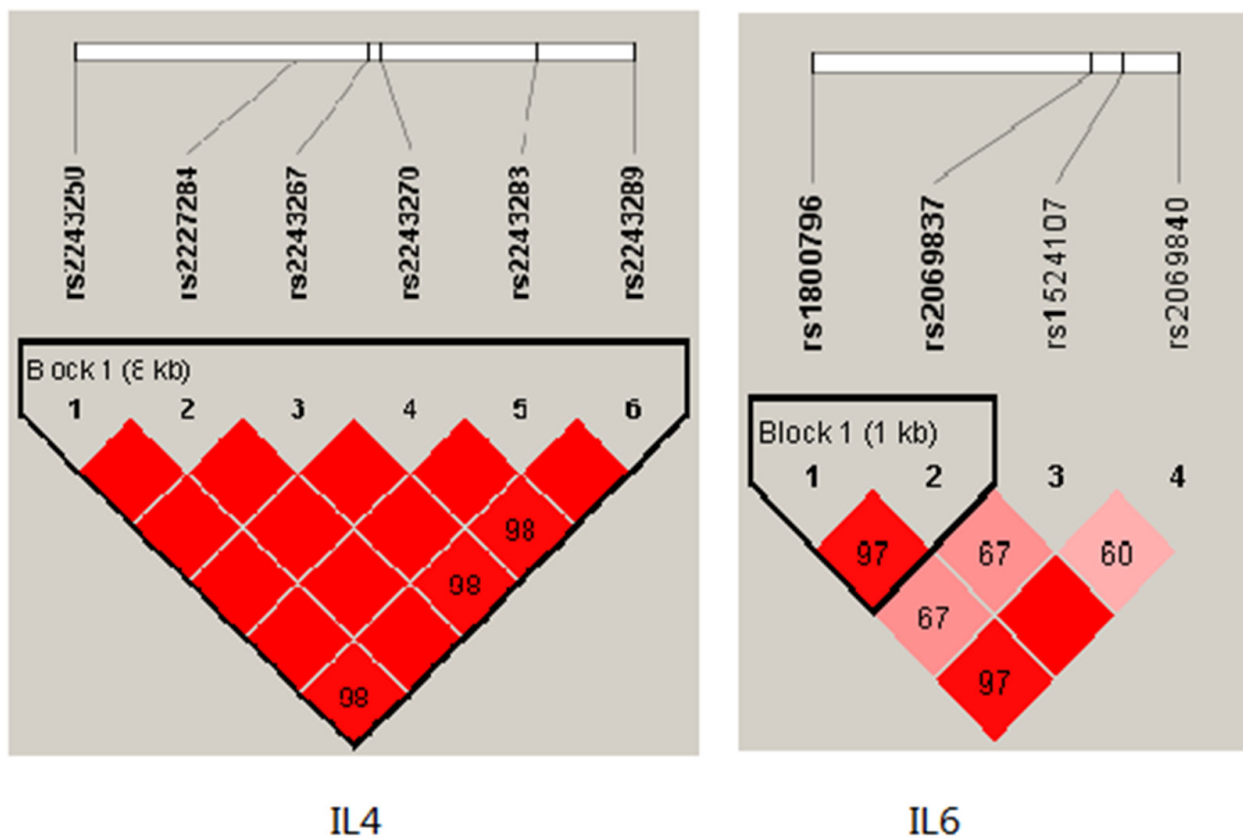

**Figure 1: Haplotype block map for the IL4, IL6 SNPs genotyped in this study.**

**Table 5: The association between SNPs and age, gender analysis of LDD patients**

| SNP       | Gene | Allele | ≤50  |           |       | >50  |           |       | Male |           |       | Female |           |       |
|-----------|------|--------|------|-----------|-------|------|-----------|-------|------|-----------|-------|--------|-----------|-------|
|           |      |        | OR   | 95%CI     | P     | OR   | 95%CI     | P     | OR   | 95%CI     | P     | OR     | 95%CI     | P     |
| rs2243250 | IL4  | C/T    | 0.88 | 0.65-1.20 | 0.430 | 0.77 | 0.57-1.04 | 0.084 | 0.87 | 0.66-1.15 | 0.320 | 0.76   | 0.55-1.06 | 0.110 |
| rs2227284 | IL4  | G/T    | 1.05 | 0.74-1.49 | 0.776 | 0.81 | 0.58-1.13 | 0.208 | 1.01 | 0.74-1.37 | 0.968 | 0.78   | 0.53-1.15 | 0.215 |
| rs2243267 | IL4  | G/C    | 0.89 | 0.66-1.22 | 0.479 | 0.81 | 0.61-1.10 | 0.177 | 0.92 | 0.7-1.22  | 0.575 | 0.76   | 0.55-1.06 | 0.109 |
| rs2243270 | IL4  | A/G    | 0.89 | 0.66-1.22 | 0.479 | 0.81 | 0.61-1.10 | 0.177 | 0.92 | 0.7-1.22  | 0.575 | 0.76   | 0.55-1.06 | 0.109 |
| rs2243283 | IL4  | G/C    | 0.81 | 0.57-1.15 | 0.243 | 0.87 | 0.63-1.20 | 0.394 | 0.76 | 0.56-1.04 | 0.085 | 0.97   | 0.67-1.41 | 0.872 |
| rs2243289 | IL4  | A/G    | 0.94 | 0.69-1.28 | 0.701 | 0.81 | 0.60-1.10 | 0.177 | 0.93 | 0.70-1.24 | 0.628 | 0.79   | 0.57-1.11 | 0.174 |
| rs1800796 | IL6  | G/C    | 1.25 | 0.93-1.66 | 0.134 | 1.34 | 1.03-1.74 | 0.029 | 1.35 | 1.05-1.73 | 0.018 | 1.20   | 0.88-1.63 | 0.246 |
| rs2069837 | IL6  | G/A    | 0.89 | 0.63-1.26 | 0.524 | 1.27 | 0.94-1.71 | 0.123 | 1.05 | 0.79-1.41 | 0.726 | 1.14   | 0.80-1.63 | 0.459 |
| rs1524107 | IL6  | T/C    | 1.18 | 0.89-1.57 | 0.257 | 1.36 | 1.05-1.77 | 0.020 | 1.30 | 1.01-1.66 | 0.040 | 1.23   | 0.91-1.67 | 0.182 |
| rs2069840 | IL6  | G/C    | 1.72 | 1.09-2.71 | 0.019 | 1.16 | 0.77-1.76 | 0.470 | 1.49 | 1.01-2.21 | 0.045 | 1.24   | 0.76-2.02 | 0.396 |

OR: odds ratio; 95% CI: 95% confidence interval.  $p < 0.05$  indicates statistical significance.

## MATERIALS AND METHODS

Genomic DNA was extracted from 2ml of whole blood which had been obtained from 961 volunteers with their informed consent. Four hundred and ninety-eight patients were recruited from the Second Affiliated Hospital of Inner Mongolia Medical University and The Hohhot First Hospital between 2015 and 2017. All participants had a magnetic resonance imaging (MRI) scan. Data regarding individual characteristics were collected by self-administered questionnaires. Primary exclusion criteria included synovial cysts, spondylolisthesis, spinal tumor, spondylosis, trauma and inflammatory disease. Individuals who had known environmental risk factors, including heavy physical loading, occupational driving, cigarette smoking or obesity (body mass index  $> 25 \text{ kg/m}^2$ ), were also excluded. The control sample consisted of with no history of back problems and with negative MRI findings.

We have selected the ten SNPs described in this study by minor allele frequency (MAF) of  $> 5\%$  in Chinese Han population and each had an  $r^2$  of  $> 0.80$  and the SNPs located at IL4 and IL6. Whole blood were used the GoldMag-Mini Whole Blood

Genomic DNA Purification Kit (GoldMag Co. Ltd. Xi'an City, China) extracted. We used a NanoDrop 2000 (Gene Company Limited) were measured DNA

concentrations. Sequenom MassARRAY Assay Design 3.0 Software was used to design a Multiplexed SNP MassEXTEND assay [26]. Sequenom MassARRAY RS1000 was used for genotyping, and the related data were managed using Sequenom Typer 4.0 Software [26, 27].

Microsoft Excel and SPSS 20.0 statistical package (SPSS, Chicago, IL) were used to perform statistical analyses. Continuous data were expressed as mean  $\pm$  SD. Chi-square analysis was used to assess differences in genotype frequencies between cases and controls. Odds ratios (OR), as estimators of relative risk, and 95% confidence intervals (95% CI) were computed using unconditional logistic regression. Associations between the selected SNPs and the risk of LDD were assessed using genotypic model analysis (co-dominant, dominant, recessive, and log-additive) by SNP stats. We used the Haploview software package (version 4.2) and SHEsis software platform for analyses of linkage disequilibrium, haplotype construction, and genetic association.  $P < 0.05$  was considered statistically significant.

## Abbreviations

lumbar disc disease: LDD; single nucleotide polymorphism: SNP; odds ratio: OR; confidence interval:

CI; minor allele frequency: MAF; Hardy-Weinberg equilibrium: HWE.

### Author contributions

Yong Zhu and Shunan Li conceived and designed the paper and wrote the manuscript.

FangLin Niu, Mengdan Yan, Jing Li performed the experiments and analyzed the experiments data.

Haiyu Jia and Xuejun Yang conceived and designed the experiments, and modify the manuscript.

### ACKNOWLEDGMENTS AND FUNDING

This work was supported by the National Natural Science Foundation of China (No. 81460332, 81360278). We are grateful to all of the patients and other individuals who made this work possible. We would also like to thank the clinicians and hospital staff who contributed to data collection for this study.

### CONFLICTS OF INTEREST

The authors declare no conflicts of interest.

### REFERENCES

1. Gupta VK, Attry S, Vashisth N, Gupta E, Marwah K, Bhargav S, Bhargav S. Lumbar degenerative disc disease: clinical presentation and treatment approaches. *IOSR-JDMS*. 2016; 15: 12-23. <http://doi.org/10.1227/01.NEU.0000325487.49020.91>.
2. Valat JP, Genevay S, Marty M, Rozenberg S, Koes B. Sciatica. *Best Pract Res Clin Rheumatol*. 2010; 24: 241-52. <http://doi.org/10.1016/j.berh.2009.11.005>.
3. Kujala UM, Taimela S, Viljanen T, Jutila H, Vitasalo JT, Videman T, Battié MC. Physical loading and performance as predictors of back pain in healthy adults. A 5-year prospective study. *Eur J Appl Physiol Occup Physiol*. 1996; 73: 452-8.
4. Ran B, Li Q, Chen J, Chen Z, Niu Y, Shi Z, Wang Z, Li M. Association between overweight or obesity and lumbar disc diseases: a meta-analysis. *J Spinal Disord Tech*. 2015; 28: 370.
5. Wahlström J, Burström L, Nilsson T, Järvholm B. Risk factors for hospitalization due to lumbar disc disease. *Spine*. 2012; 37: 1334-9. <http://doi.org/10.1097/BRS.0b013e31824b5464>.
6. Ala-Kokko L. Genetic risk factors for lumbar disc disease. *Ann Med*. 2002; 34: 42.
7. Takahashi M, Haro H, Wakabayashi Y, Kawa-Uchi T, Komori H, Shinomiya K. The association of degeneration of the intervertebral disc with 5a/6a polymorphism in the promoter of the human matrix metalloproteinase-3 gene. *J Bone Joint Surg Br*. 2001; 83: 491-5.
8. Basaran R, Senol M, Ozkanli S, Efendioglu M, Kaner T. Correlation of matrix metalloproteinase (MMP)-1, -2, -3, and -9 expressions with demographic and radiological features in primary lumbar intervertebral disc disease. *J Clin Neurosci*. 2017; 41: 46-9. <http://doi.org/10.1016/j.jocn.2017.03.001>.
9. Videman T, Gibbons LE, Battié MC, Maravilla K, Vanninen E, Leppävuori J, Kaprio J, Peltonen L. The relative roles of intragenic polymorphisms of the vitamin d receptor gene in lumbar spine degeneration and bone density. *Spine*. 2001; 26: 7-12.
10. Park JB, Park SJ, Riew KD. Mitochondrial involvement in fas-mediated apoptosis of human lumbar disc cells. *J Bone Joint Surg Am*. 2005; 87: 1338-42. <http://doi.org/10.2106/JBJS.D.02527>.
11. Zhang Z, Zhang J, Ding L, Teng X. Meta-analysis of the association between COL9A2 genetic polymorphisms and lumbar disc disease susceptibility. *Spine (Phila Pa 1976)*. 2014; 39: 1699-706. <http://doi.org/10.1097/BRS.035630R1035630R10497>.
12. Üçeyler N, Tschärke A, Sommer C. Early cytokine gene expression in mouse CNS after peripheral nerve lesion. *Neurosci Lett*. 2008; 436: 259-64. <http://doi.org/10.1016/j.neulet.2008.03.037>.
13. Zhou Z, Peng X, Hagshenas J, Insolera R, Fink DJ, Mata M. A novel cell-cell signaling by microglial transmembrane TNF $\alpha$  with implications for neuropathic pain. *Pain*. 2010; 151: 296-306. <http://doi.org/10.1016/j.pain.2010.06.017>.
14. Kelempisioti A, Eskola PJ, Okuloff A, Karjalainen U, Takatalo J, Daavittila I, Niinimäki J, Sequeiros RB, Tervonen O, Solovieva S. Genetic susceptibility of intervertebral disc degeneration among young Finnish adults. *BMC Med Genet*. 2011; 12: 153. <http://doi.org/10.1186/1471-2350-12-153>.
15. Eskola PJ, Kjaer P, Daavittila IM, Solovieva S, Okuloff A, Sorensen JS, Wedderkopp N, Ala-Kokko L, Männikkö M, Karpinen JI. Genetic risk factors of disc degeneration among 12-14-year-old Danish children: a population study. *Int J Mol Epidemiol Genet*. 2010; 1: 158-65.
16. Burke JG, Watson RW, McCormack D, Dowling FE, Walsh MG, Fitzpatrick JM. Intervertebral discs which cause low back pain secrete high levels of proinflammatory mediators. *J Bone Joint Surg Br*. 2002; 84: 196.
17. Kang JD, Georgescu HI, McIntyre-Larkin L, Stefanovic-Racic M, Evans CH. Herniated cervical intervertebral discs spontaneously produce matrix metalloproteinases, nitric oxide, interleukin-6, and prostaglandin E2. *Spine*. 1996; 21: 271-7.
18. Kraychete DC, Sakata RK, Issy AM, Bacellar O, Santosjesus R, Carvalho EM. Serum cytokine levels in patients with chronic low back pain due to herniated disc: analytical cross-sectional study. 2010; 128: 259-62.

19. Kehrli P, Esposito P, Pinheiro-Franco JL. Epidemiology of Lumbar Degenerative Disk Disease. Springer. 2016.
20. Weber KT, Alipui DO, Sison CP, Bloom O, Quraishi S, Overby MC, Levine M, Chahine NO. Serum levels of the proinflammatory cytokine interleukin-6 vary based on diagnoses in individuals with lumbar intervertebral disc diseases. *Arthritis Res Ther*. 2016; 18: 3. <http://doi.org/10.1186/s13075-015-0887-8>.
21. Noponenhietala N, Virtanen I, Karttunen R, Schwenke S, Jakkula E, Li H, Merikivi R, Barral S, Ott J, Karppinen J. Genetic variations in IL6 associate with intervertebral disc disease characterized by sciatica. *Pain*. 2005; 114: 186-94. <http://doi.org/10.1016/j.pain.2004.12.015>.
22. Pedersen LM, Schistad E, Jacobsen LM, Røe C, Gjerstad J. Serum levels of the pro-inflammatory interleukins 6 (IL-6) and -8 (IL-8) in patients with lumbar radicular pain due to disc herniation: a 12-month prospective study. *Brain Behav Immun*. 2015; 46: 132-6. <http://doi.org/10.1016/j.bbi.2015.01.008>.
23. Deng X, Zhao F, Kang B, Zhang X. Elevated interleukin-6 expression levels are associated with intervertebral disc degeneration. *Exp Ther Med*. 2016; 11: 1425. <http://doi.org/10.3892/etm.2016.3079>.
24. Samuel JM, Kelberman D, Smith AJ, Humphries SE, Woo P. Identification of a novel regulatory region in the interleukin-6 gene promoter. *Cytokine*. 2008; 42: 256-64. <http://doi.org/10.1016/j.cyto.2008.02.008>.
25. Bartova J, Borilova LP, Podzimek S, Janatova T, Svobodova K, Fassmann A, Duskova J, Belacek J, Izakovicova HL. The effect of IL-4 gene polymorphisms on cytokine production in patients with chronic periodontitis and in healthy controls. *Mediators Inflamm*. 2015; 2014: 185757. <http://doi.org/10.1155/2014/185757>.
26. Gabriel S, Ziaugra L, Tabbaa D. SNP genotyping using the Sequenom MassARRAY iPLEX platform. *Curr Protoc Hum Genet*. 2009; Chapter 2: Unit 2.12. <http://doi.org/10.1002/0471142905.hg0212s60>.
27. Thomas RK, Baker AC, Debiasi RM, Winckler W, Laframboise T, Lin WM, Wang M, Feng W, Zander T, Macconail L. High-throughput oncogene mutation profiling in human cancer. *Nat Genet*. 2007; 39: 347-51. <http://doi.org/10.1038/ng1975>.
